# Supplementary material
Source: publisher figshare collection journal article supplement (https://acs.figshare.com/ndownloader/files/5134246)
Supplement: Supplementary file 1 [file 5134246]

Figure 2. Comparison of the emission spectrum of  $\text{Er}^{3+}$  in  $(\text{THF})_{14}\text{Er}_{10}\text{S}_6\text{Se}_{12}\text{I}_6$  complex and phosphate glass with same order of  $\text{Er}^{3+}$  concentration.

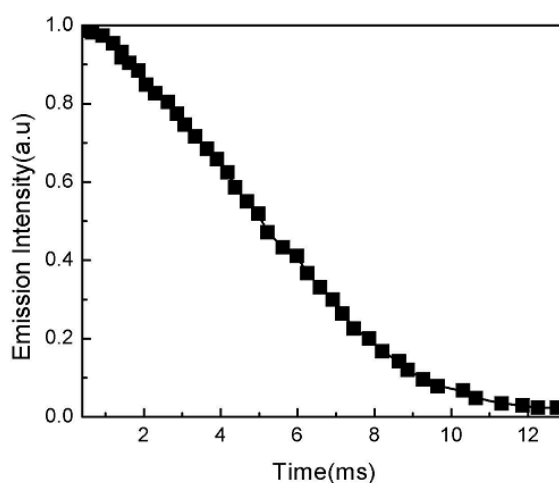

Figure 3. Fluorescence decay curve of the 1540 nm emission in  $\text{Er}_{10}\text{S}_6\text{Se}_{12}\text{I}_6$  complex under 980 nm laser excitation.

Table 1. Comparison of the fluorescence lifetime and phonon frequencies of some reported Er containing solid-state materials.

| Host      | Lifetime(ms) | Phonon frequency( $\text{cm}^{-1}$ ) |
|-----------|--------------|--------------------------------------|
| Sulphide  | 3.0          | 450-700                              |
| Selenide  | 2.3          | 450-700                              |
| Tellurite | 4            | 450-700                              |
| Phosphate | 11           | 1200                                 |
| Borate    | 8            | 1400                                 |
| Silicate  | 15           | 1100                                 |
| Germanate | 6            | 900                                  |
| ZBLA      | 10           | 500                                  |
| Halide    | 10-30        | 200-400                              |
| YAG       | 8            | 400                                  |
